# Supplementary material for: The Open DAC 2023 Dataset and Challenges for Sorbent Discovery in Direct Air Capture
Source: PubMed Central journal article supplement (PMC11117325; doi:10.1021/acscentsci.3c01629), 2024-05-01
Supplement: oc3c01629_si_001.pdf [file oc3c01629_si_001.pdf]

Supporting Information for  
**The Open DAC 2023 Dataset and Challenges for  
Sorbent Discovery in Direct Air Capture**

Anuroop Sriram,<sup>\*,†</sup> Sihoon Choi,<sup>†,‡</sup> Xiaohan Yu,<sup>‡</sup> Logan M. Brabson,<sup>‡</sup> Abhishek Das,<sup>†</sup> Zachary Ulissi,<sup>†</sup> Matt Uyttendaele,<sup>†</sup> Andrew J. Medford,<sup>\*,‡</sup> and David S. Sholl<sup>\*,‡,¶</sup>

<sup>†</sup>*Fundamental AI Research, Meta AI, Meta, Menlo Park, CA, USA*

<sup>‡</sup>*School of Chemical and Biomolecular Engineering, Georgia Institute of Technology, Atlanta, GA, USA*

<sup>¶</sup>*Oak Ridge National Laboratory, Oak Ridge, TN, USA*

E-mail: anuroops@meta.com; ajm@gatech.edu; shollds@ornl.gov

## Supplementary Figures

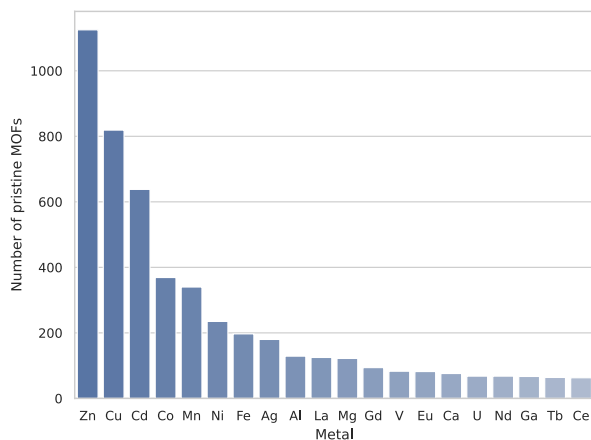

Figure S1: Top 20 metal atoms in pristine MOFs.

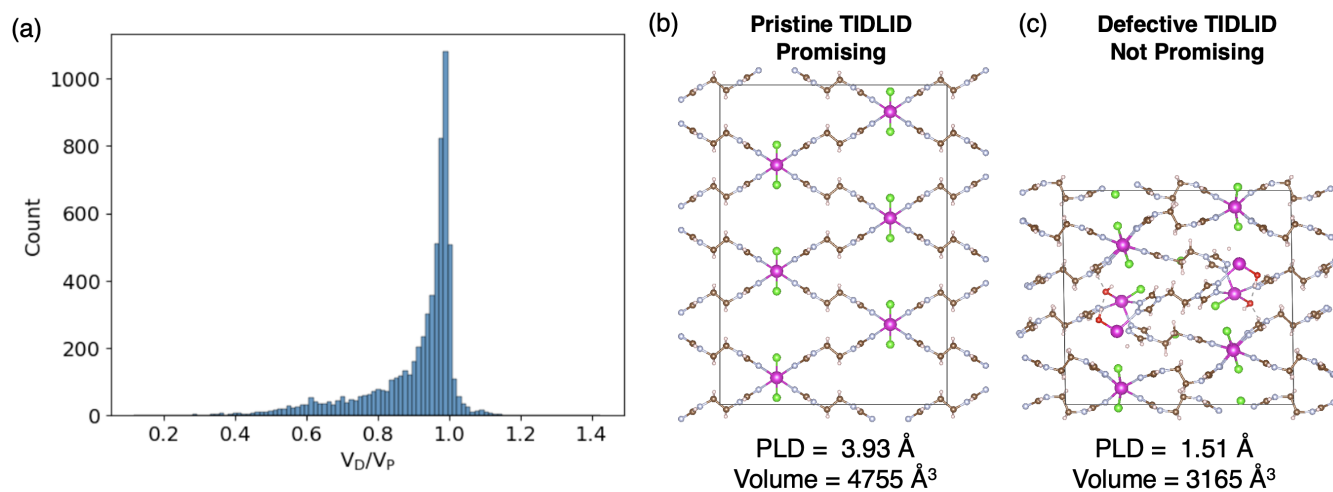

Figure S2: (a) A histogram of the ratio of the defective MOF volume ( $V_D$ ) over the pristine MOF volume ( $V_P$ ), with all structures fully DFT relaxed. The structure of relaxed (b) pristine and (c) defective TIDLID with a defect concentration of 0.08, showing structural collapse on defect formation.

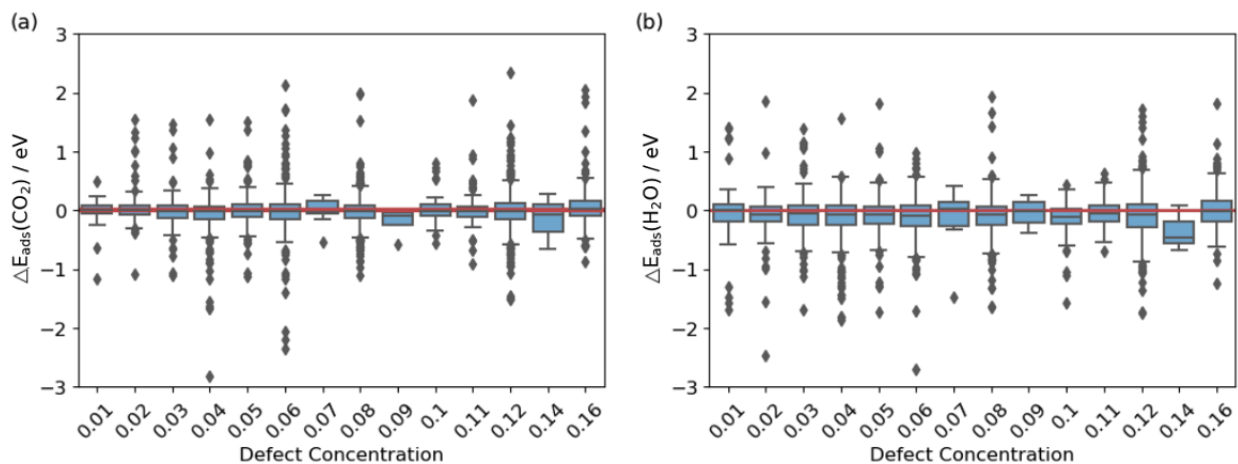

Figure S3: The influence of defect concentration on the adsorption energies of (a)  $\text{CO}_2$  and (b)  $\text{H}_2\text{O}$  in MOFs.  $\Delta E = E_{\text{Defective}} - E_{\text{Pristine}}$ .

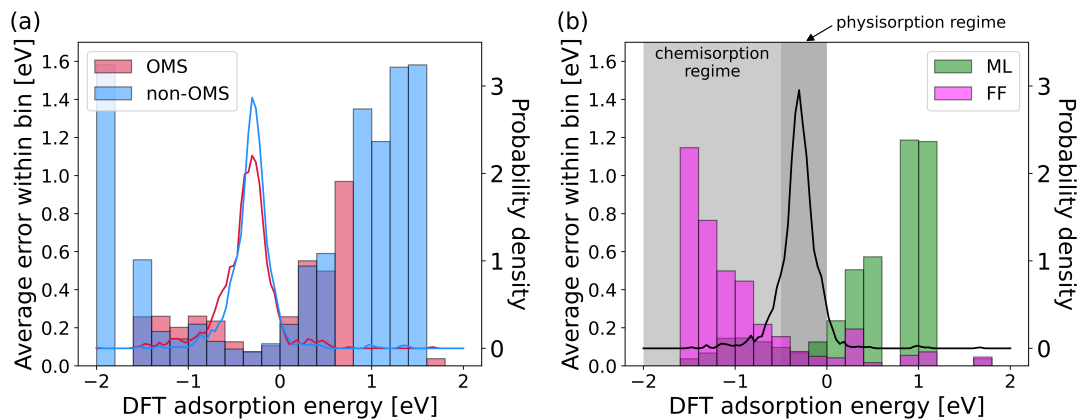

Figure S4: Binned errors and relative density of the number of points (solid lines) as a function of DFT adsorption energy for (a) ML predicted adsorption energies on open metal site (OMS) (red) and non-OMS (blue) and (b) interaction energies predicted by FFs (magenta) and corresponding adsorption energies predicted by ML (green) models. This plot is an extension of Figure 7, displaying DFT adsorption energies within the range of -2 eV to 2 eV.

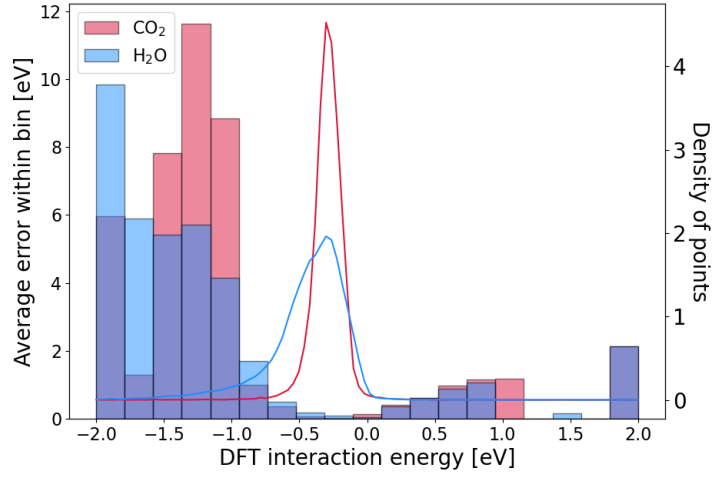

Figure S5: Binned FF errors and DFT interaction energy distributions split by adsorbate for all 51,252 systems with  $-2 \leq E_{\text{int}}^{\text{DFT}} \leq 2$  eV irrespective of FF interaction energy.

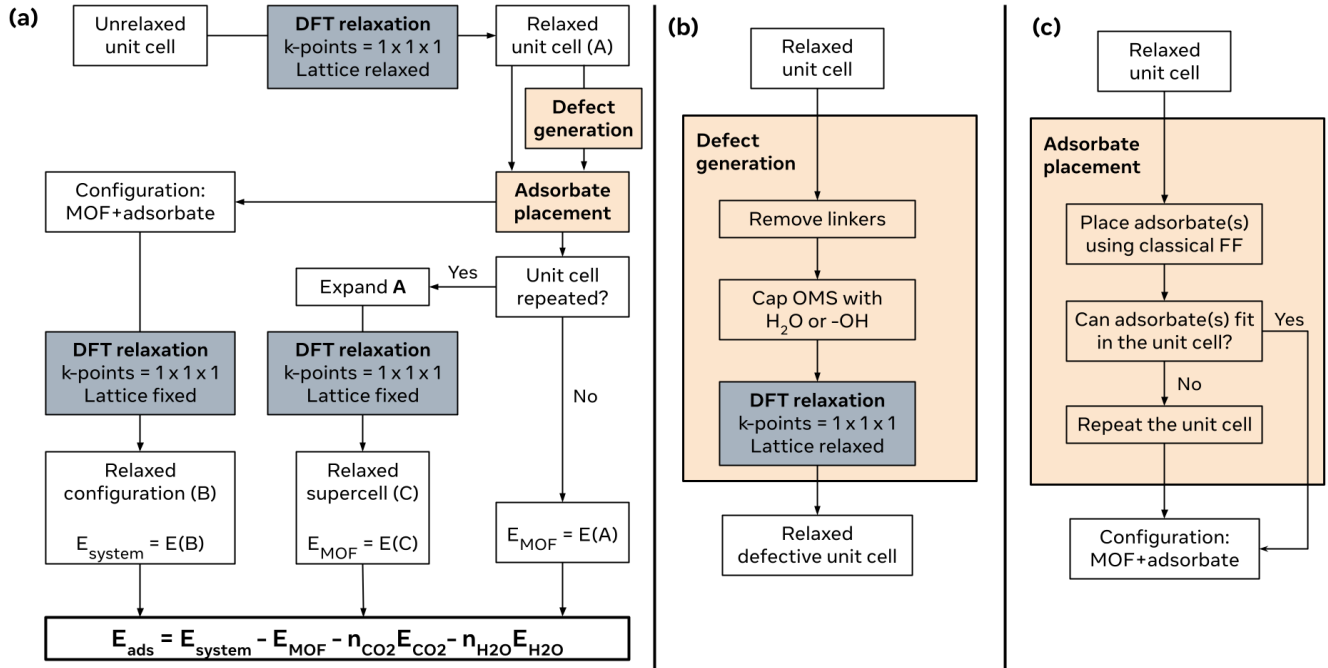

Figure S6: The workflow for generating and relaxing pristine and defective MOF structures in ODAC23.

## Supplementary Tables

Table S1: Summary of ODAC23 dataset organised by task and split

| Task        | Split                        | MOF + CO <sub>2</sub> | MOF + H <sub>2</sub> O | MOF + CO <sub>2</sub> + H <sub>2</sub> O | MOF + CO <sub>2</sub> + 2H <sub>2</sub> O | Total             |
|-------------|------------------------------|-----------------------|------------------------|------------------------------------------|-------------------------------------------|-------------------|
| S2EF        | train                        | 6,608,649             | 5,196,597              | 13,092,633                               | 10,973,416                                | 35,871,295        |
|             | val                          | 160,841               | 125,984                | 310,093                                  | 242,647                                   | 839,565           |
|             | test-id                      | 163,574               | 133,372                | 360,413                                  | 316,156                                   | 973,515           |
|             | test-ood (big)               | 62,718                | 63,711                 | 136,374                                  | 118,416                                   | 381,219           |
|             | test-ood (linker)            | 50,392                | 14,242                 | 99,376                                   | 123,115                                   | 287,125           |
|             | test-ood (topology)          | 71,384                | 60,308                 | 182,255                                  | 158,309                                   | 472,256           |
|             | test-ood (linker & topology) | 27,281                | 24,351                 | 60,121                                   | 47,020                                    | 158,773           |
|             | <b>Total</b>                 |                       | <b>7,144,839</b>       | <b>5,618,565</b>                         | <b>14,241,265</b>                         | <b>11,979,079</b> |
| IS2RE/IS2RS | train                        | 46,274                | 34,456                 | 48,373                                   | 33,121                                    | 162,224           |
|             | val                          | 1,138                 | 862                    | 1,211                                    | 787                                       | 3,998             |
|             | test-id                      | 1,291                 | 972                    | 1,420                                    | 986                                       | 4,669             |
|             | test-ood (big)               | 533                   | 383                    | 534                                      | 318                                       | 1,768             |
|             | test-ood (linker)            | 355                   | 87                     | 383                                      | 357                                       | 1,182             |
|             | test-ood (topology)          | 439                   | 306                    | 533                                      | 334                                       | 1,612             |
|             | test-ood (linker & topology) | 166                   | 135                    | 172                                      | 106                                       | 579               |
|             | <b>Total</b>                 |                       | <b>50,196</b>          | <b>37,201</b>                            | <b>52,626</b>                             | <b>36,009</b>     |

Table S2: Top 7 organic linkers in the pristine MOFs

| SMILES                                               | Structure                                                                            | Number of Pristine MOFs |
|------------------------------------------------------|--------------------------------------------------------------------------------------|-------------------------|
| <chem>[O-]C(=O)c1ccc(cc1)C(=O)[O-]</chem>            | 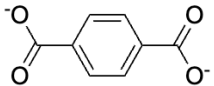  | 316                     |
| <chem>[O-]C(=O)c1cc(cc(c1)C(=O)[O-])C(=O)[O-]</chem> |  | 244                     |
| <chem>C#N</chem>                                     |   | 220                     |
| <chem>n1ccc(cc1)c1ccncc1</chem>                      |  | 216                     |
| <chem>[O-]P(=O)([O-])[O-]</chem>                     |   | 157                     |
| <chem>[O-]C(=O)C(=O)[O-]</chem>                      |   | 151                     |
| <chem>[O-]C=O</chem>                                 |   | 99                      |

Table S3: Top 10 promising pristine MOFs with stronger CO<sub>2</sub> adsorption energy compared to H<sub>2</sub>O by DFT calculations [eV]

| MOF               | $E_{\text{ads}}(\text{CO}_2)$ | $E_{\text{ads}}(\text{H}_2\text{O})$ | $E_{\text{ads}}(\text{CO}_2) - E_{\text{ads}}(\text{H}_2\text{O})\uparrow$ | $E_{\text{ads}}(\text{CO}_2 + \text{H}_2\text{O})$ | $E_{\text{inter\_mol}}^{\text{1st}}$ | $E_{\text{ads}}(\text{CO}_2 + 2\text{H}_2\text{O})$ | $E_{\text{inter\_mol}}^{\text{2nd}}$ |
|-------------------|-------------------------------|--------------------------------------|----------------------------------------------------------------------------|----------------------------------------------------|--------------------------------------|-----------------------------------------------------|--------------------------------------|
| IPIDUH            | -1.98                         | 0.32                                 | -2.30                                                                      | -0.63                                              | 1.04                                 | -2.51                                               | -2.20                                |
| KOQLUZ            | -1.50                         | 0.70                                 | -2.19                                                                      | -3.11                                              | -2.31                                | -3.54                                               | -1.13                                |
| LEWZET            | -0.89                         | 0.81                                 | -1.69                                                                      | 0.14                                               | 0.23                                 | -4.53                                               | -5.48                                |
| TUGTAR            | -1.74                         | -0.47                                | -1.27                                                                      | -1.70                                              | 0.51                                 |                                                     |                                      |
| cm503311x_alf175K | -0.64                         | 0.48                                 | -1.12                                                                      | -0.03                                              | 0.13                                 | -2.20                                               | -2.66                                |
| TONWUO            | -1.71                         | -0.63                                | -1.09                                                                      | -2.68                                              | -0.34                                | -3.78                                               | -0.48                                |
| IMAGAG            | -1.14                         | -0.07                                | -1.07                                                                      | -1.85                                              | -0.64                                |                                                     |                                      |
| EGIFUV            | -1.45                         | -0.41                                | -1.04                                                                      | -0.43                                              | 1.42                                 | -0.87                                               | -0.03                                |
| ZIDBEV            | -1.91                         | -0.91                                | -1.00                                                                      | -2.83                                              | 0.00                                 | -4.40                                               | -0.66                                |
| PETWIW            | -0.72                         | 0.28                                 | -0.99                                                                      | -1.38                                              | -0.93                                | -1.09                                               | 0.01                                 |

Table S4: Top 10 promising defective MOFs with stronger CO<sub>2</sub> adsorption energy compared to H<sub>2</sub>O by DFT calculations [eV]

| MOF            | Defect conc. | $E_{\text{ads}}(\text{CO}_2)$ | $E_{\text{ads}}(\text{H}_2\text{O})$ | $E_{\text{ads}}(\text{CO}_2) - E_{\text{ads}}(\text{H}_2\text{O})\uparrow$ | $E_{\text{ads}}(\text{CO}_2 + \text{H}_2\text{O})$ | $E_{\text{inter\_mol}}^{\text{1st}}$ | $E_{\text{ads}}(\text{CO}_2 + 2\text{H}_2\text{O})$ | $E_{\text{inter\_mol}}^{\text{2nd}}$ |
|----------------|--------------|-------------------------------|--------------------------------------|----------------------------------------------------------------------------|----------------------------------------------------|--------------------------------------|-----------------------------------------------------|--------------------------------------|
| AFENEE         | 0.12         | -1.86                         | -0.34                                | -1.52                                                                      | -0.81                                              | 1.40                                 | -1.65                                               | -0.50                                |
| OKIXIQ_charged | 0.12         | -1.29                         | -0.09                                | -1.20                                                                      | -1.09                                              | 0.29                                 | -0.86                                               | 0.31                                 |
| IDAGEA_charged | 0.06         | -1.18                         | -0.25                                | -0.93                                                                      | -1.23                                              | 0.21                                 | -2.42                                               | -0.94                                |
| PEGCAH         | 0.06         | -1.60                         | -0.77                                | -0.83                                                                      | -2.83                                              | -0.47                                | -3.13                                               | 0.46                                 |
| COTXEQ         | 0.12         | -0.60                         | 0.15                                 | -0.74                                                                      | -1.05                                              | -0.59                                | -1.56                                               | -0.66                                |
| ODAHIK_charged | 0.12         | -1.02                         | -0.30                                | -0.71                                                                      | -1.60                                              | -0.28                                | -1.97                                               | -0.06                                |
| HUWDEJ         | 0.12         | -1.36                         | -0.65                                | -0.71                                                                      | -1.19                                              | 0.82                                 | -2.30                                               | -0.46                                |
| HAJLUA         | 0.16         | -0.93                         | -0.26                                | -0.68                                                                      | -3.83                                              | -2.64                                | -1.95                                               | 2.14                                 |
| HAJLOU         | 0.16         | -1.02                         | -0.35                                | -0.67                                                                      | -1.80                                              | -0.43                                | -4.32                                               | -2.16                                |
| MALRUM         | 0.04         | -1.29                         | -0.65                                | -0.64                                                                      | -2.14                                              | -0.20                                | -2.86                                               | -0.07                                |

Table S5: Motif frequency normalization results in the pristine and defective MOFs

| Specificity* | OMS  | PAR  | M-O-M | Uncoordinated N | Amine |
|--------------|------|------|-------|-----------------|-------|
| Pristine     | 1.10 | 0.87 | 0.69  | 1.28            | 0.34  |
| Defective    | 0.97 | 0.85 | 0.79  | 1.02            | 0.63  |

Specificity<sub>*i*</sub> =  $(N_{\text{promising}_i}/N_i)/(N_{\text{promising}}/N_{\text{total}})$ .  $N_{\text{promising}_i}$  is the number of promising MOFs with motif *i*.  $N_i$  is the total number of MOFs in the database with motif *i*.  $N_{\text{promising}}$  is the total number of promising MOFs.  $N_{\text{total}}$  is the total number of MOFs in the pristine/defective population.

Table S6: Available Common Names for Promising MOFs

| Code Name              | Common Name         |
|------------------------|---------------------|
| ANUGOG                 | UMCM-153            |
| CAVNOE                 | MIL-53(Sc)-NO2      |
| cm501138g_si_002       | CuBTC               |
| DEJRUH                 | BIF-23              |
| DICKEH                 | NJU-Bai12           |
| EGIFUV                 | UCR-9               |
| FAGQAI                 | TCM-10              |
| FEYJOJ                 | MOF-502             |
| FIZPOV                 | JUC-118             |
| IXEJOM                 | PCN-700-(CF3)2      |
| IYEHAX                 | Cu-PEIP             |
| jp302979a_si_002       | USF2-RuBpy          |
| LUDKOM                 | STAM-1 acetaldehyde |
| MIXBIG_auto            | NTU-113             |
| NASREH                 | UPC-8               |
| NEVVEQ                 | CUK-2               |
| ODIXEG                 | PCN-516             |
| OLOPEM                 | TMU-5 (Cd 15%)      |
| RUBTAK03_auto          | UiO-66              |
| science.1056698_manual | MOF-14              |
| SUSZOW                 | STA-15              |
| WIKLOT                 | EDP-U4              |
| WIRMOB                 | PMOF-1              |
| XALDAS                 | WUF-10              |
| XAMDUM07               | CuBTC               |
| XANMUX04               | FJU-53-Br           |
| XITYOP                 | PCN-14              |
| YILJAG                 | MAF-X11             |
| ZILFOR_manual          | IFMC-16             |
| CODFUX_0.06_0          | MAP-GIS1            |
| HIFTOG02_0.08_0        | MOF-5               |
| HOWQEQ_0.08_0          | JUC-68              |
| IKETOH_manual_0.12_0   | CuBTC               |
| KOJZIT_0.16_0          | MOF-602             |
| LUYHAP_0.16_0          | PCN-46              |
| MAKXAZ_0.16_1          | RPM4-Zn             |
| MIMFOF_0.03_1          | AIPO-BDA            |
| MIMFOF_0.1_1           | AIPO-BDA            |
| MUNDAC_0.12_0          | JLU-Liu15           |
| NABMUA_0.16_0          | Mg-MOF-1            |
| NIGDEO_0.14_1          | PCN-88              |
| NOKJON_0.12_0          | UZnP-2              |
| NUNCEG_0.12_0          | LiTCS               |
| SADMUH_SL_0.06_0       | MIL-53              |
| VANXUD_0.04_0          | UCSB-3              |
| VUKROK_0.16_0          | DUT-8(Ni)           |
| XADDIR_manual_0.12_0   | NENU-29, CuBTC      |

Table S7: List of ML model architectures used in this work and the different tasks they were used for

| Model                               | # of Parameters | Equivariant Reps | Tasks |              |             |       |
|-------------------------------------|-----------------|------------------|-------|--------------|-------------|-------|
|                                     |                 |                  | S2EF  | IS2RE-direct | IS2RE-Relax | IS2RS |
| SchNet <sup>118</sup>               | 9.1M            | ✗                | ✓     | *            | *           | *     |
| DimeNet++ <sup>144</sup>            | 1.8M            | ✗                | ✓     | *            | *           | *     |
| PaiNN <sup>120</sup>                | 20.1M           | ✓                | ✓     | *            | *           | *     |
| GemNet-OC <sup>121</sup>            | 38.9M           | ✗                | ✓     | ✓            | ✓           | ✓     |
| eSCN <sup>122</sup>                 | 51.6M           | ✓                | ✓     | ✓            | ✓           | ✓     |
| EquiformerV2 <sup>123</sup>         | 31.1M           | ✓                | ✓     | ✓            | ✓           | ✓     |
| EquiformerV2 (large) <sup>123</sup> | 153M            | ✓                | ✓     | ✓            | ✓           | ✓     |

\* Skipped because S2EF results were not competitive

Table S8: Results on the S2EF task for the various test splits

| Split        | Model                | Force MAE [meV/Å] ↓ | Force Cos ↑ | Energy MAE [eV] ↓ | EFwT ↑ |
|--------------|----------------------|---------------------|-------------|-------------------|--------|
| test-id      | Median baseline      | 16.02               | 0.001       | 0.406             | 0.00%  |
|              | SchNet               | 14.44               | 0.254       | 0.368             | 0.02%  |
|              | DimeNet++            | 14.31               | 0.226       | 0.416             | 0.02%  |
|              | PaiNN                | 13.04               | 0.345       | 0.241             | 0.11%  |
|              | GemNet-OC            | 9.87                | 0.605       | 0.153             | 1.16%  |
|              | eSCN                 | 9.15                | 0.658       | 0.165             | 1.84%  |
|              | EquiformerV2         | 7.26                | 0.674       | 0.182             | 1.97%  |
|              | EquiformerV2 (large) | 8.20                | 0.685       | 0.145             | 2.61%  |
| test-ood(b)  | Median baseline      | 7.98                | 0.001       | 0.334             | 0.00%  |
|              | SchNet               | 8.16                | 0.146       | 0.529             | 0.00%  |
|              | DimeNet++            | 7.85                | 0.157       | 0.728             | 0.00%  |
|              | PaiNN                | 7.53                | 0.242       | 0.282             | 0.12%  |
|              | GemNet-OC            | 6.19                | 0.495       | 0.207             | 0.81%  |
|              | eSCN                 | 5.62                | 0.559       | 0.170             | 1.15%  |
|              | EquiformerV2         | 4.91                | 0.610       | 0.166             | 1.92%  |
|              | EquiformerV2 (large) | 4.75                | 0.612       | 0.135             | 3.07%  |
| test-ood(l)  | Median baseline      | 14.65               | 0.000       | 0.378             | 0.00%  |
|              | Schnet               | 13.36               | 0.262       | 0.474             | 0.00%  |
|              | Dimenet++            | 12.15               | 0.253       | 0.501             | 0.01%  |
|              | PaiNN                | 11.47               | 0.378       | 0.252             | 0.05%  |
|              | Gemnet-OC            | 8.98                | 0.640       | 0.182             | 0.29%  |
|              | eSCN                 | 7.69                | 0.719       | 0.179             | 0.59%  |
|              | EquiformerV2         | 6.85                | 0.760       | 0.161             | 1.36%  |
|              | EquiformerV2 (Large) | 6.42                | 0.761       | 0.175             | 2.03%  |
| test-ood(t)  | Median baseline      | 16.18               | 0.000       | 0.677             | 0.00%  |
|              | SchNet               | 14.83               | 0.181       | 1.001             | 0.00%  |
|              | DimeNet++            | 13.62               | 0.183       | 1.297             | 0.00%  |
|              | PaiNN                | 18.18               | 0.267       | 0.507             | 0.01%  |
|              | GemNet-OC            | 12.59               | 0.488       | 0.312             | 0.05%  |
|              | eSCN                 | 12.79               | 0.560       | 0.370             | 0.09%  |
|              | EquiformerV2         | 10.19               | 0.617       | 0.341             | 0.52%  |
|              | EquiformerV2 (large) | 8.80                | 0.631       | 0.292             | 0.51%  |
| test-ood(lt) | Median baseline      | 13.71               | 0.000       | 0.528             | 0.00%  |
|              | SchNet               | 13.23               | 0.234       | 0.746             | 0.00%  |
|              | DimeNet++            | 12.44               | 0.234       | 0.886             | 0.00%  |
|              | PaiNN                | 11.97               | 0.349       | 0.417             | 0.00%  |
|              | GemNet-OC            | 10.22               | 0.589       | 0.335             | 0.05%  |
|              | eSCN                 | 8.78                | 0.680       | 0.305             | 0.25%  |
|              | EquiformerV2         | 7.31                | 0.727       | 0.302             | 0.52%  |
|              | EquiformerV2 (large) | 7.20                | 0.720       | 0.316             | 0.48%  |



Table S9: Comparison of S2EF metrics for MOFs with and without OMSs.

*S2EF* Test - Open Metal Sites

| Model           | OMS               |                     | Non-OMS           |                     |
|-----------------|-------------------|---------------------|-------------------|---------------------|
|                 | Energy MAE [eV] ↓ | Force MAE [meV/Å] ↓ | Energy MAE [eV] ↓ | Force MAE [meV/Å] ↓ |
| Median baseline | 0.433             | 16.25               | 0.355             | 15.50               |
| GemNet-OC       | 0.164             | 10.04               | 0.129             | 9.47                |
| eSCN            | 0.186             | 9.29                | 0.120             | 8.82                |
| EquiformerV2    | 0.204             | 8.18                | 0.169             | 6.85                |

Table S10: Comparison of S2EF metrics for pristine and defective MOFs.

*S2EF* Test - Pristine vs Defective

| Model           | Pristine          |                     | Defective         |                     |
|-----------------|-------------------|---------------------|-------------------|---------------------|
|                 | Energy MAE [eV] ↓ | Force MAE [meV/Å] ↓ | Energy MAE [eV] ↓ | Force MAE [meV/Å] ↓ |
| Median baseline | 0.406             | 16.02               | 0.395             | 12.12               |
| GemNet-OC       | 0.153             | 9.87                | 0.182             | 8.05                |
| eSCN            | 0.165             | 9.15                | 0.199             | 7.36                |
| EquiformerV2    | 0.187             | 8.11                | 0.176             | 6.58                |

Table S11: Full results of metrics for IS2RE task on all data splits.

| Initial Structure to Relaxed Energy ( <i>IS2RE</i> ) Test |            |                      |                   |        |
|-----------------------------------------------------------|------------|----------------------|-------------------|--------|
| Split                                                     | Method     | Model                | Energy MAE [eV] ↓ | EwT ↑  |
| test-id                                                   | Direct     | GemNet-OC            | 0.181             | 10.40% |
|                                                           |            | eSCN                 | 0.179             | 11.11% |
|                                                           |            | EquiformerV2         | 0.172             | 10.77% |
|                                                           | Relaxation | SchNet               | 0.485             | 3.10%  |
|                                                           |            | DimeNet++            | 0.496             | 3.23%  |
|                                                           |            | PaiNN                | 0.225             | 9.10%  |
|                                                           |            | GemNet-OC            | 0.174             | 12.18% |
|                                                           |            | eSCN                 | 0.200             | 12.33% |
|                                                           |            | EquiformerV2         | 0.227             | 11.59% |
|                                                           |            | EquiformerV2 (large) | 0.169             | 14.47% |
| test-ood(b)                                               | Direct     | GemNet-OC            | 0.220             | 7.13%  |
|                                                           |            | eSCN                 | 0.206             | 8.31%  |
|                                                           |            | EquiformerV2         | 0.197             | 7.35%  |
|                                                           | Relaxation | SchNet               | 0.621             | 1.64%  |
|                                                           |            | DimeNet++            | 0.801             | 1.36%  |
|                                                           |            | PaiNN                | 0.238             | 6.73%  |
|                                                           |            | GemNet-OC            | 0.258             | 7.43%  |
|                                                           |            | eSCN                 | 0.289             | 9.54%  |
|                                                           |            | EquiformerV2         | 0.276             | 6.96%  |
|                                                           |            | EquiformerV2 (large) | 0.179             | 8.98%  |
| test-ood(l)                                               | Direct     | GemNet-OC            | 0.220             | 8.84%  |
|                                                           |            | eSCN                 | 0.217             | 12.50% |
|                                                           |            | EquiformerV2         | 0.223             | 12.50% |
|                                                           | Relaxation | SchNet               | 0.621             | 3.72%  |
|                                                           |            | Dimenet++            | 0.651             | 2.20%  |
|                                                           |            | PaiNN                | 0.248             | 7.01%  |
|                                                           |            | GemNet-OC            | 0.244             | 8.19%  |
|                                                           |            | eSCN                 | 0.353             | 5.32%  |
|                                                           |            | EquiformerV2         | 0.241             | 9.98%  |
|                                                           |            | EquiformerV2 (large) | 0.232             | 10.47% |
| test-ood(t)                                               | Direct     | GemNet-OC            | 0.494             | 4.05%  |
|                                                           |            | eSCN                 | 0.404             | 4.73%  |
|                                                           |            | EquiformerV2         | 0.450             | 8.11%  |
|                                                           | Relaxation | SchNet               | 1.040             | 0.62%  |
|                                                           |            | DimeNet++            | 1.327             | 0.43%  |
|                                                           |            | PaiNN                | 0.473             | 5.14%  |
|                                                           |            | GemNet-OC            | 0.399             | 8.04%  |
|                                                           |            | eSCN                 | 0.440             | 7.23%  |
|                                                           |            | EquiformerV2         | 0.441             | 6.39%  |
|                                                           |            | EquiformerV2 (large) | 0.366             | 8.15%  |
| test-ood(lt)                                              | Direct     | GemNet-OC            | 0.385             | 6.68%  |
|                                                           |            | eSCN                 | 0.360             | 7.02%  |
|                                                           |            | EquiformerV2         | 0.336             | 6.51%  |
|                                                           | Relaxation | SchNet               | 0.711             | 2.05%  |
|                                                           |            | DimeNet++            | 1.116             | 0.68%  |
|                                                           |            | PaiNN                | 0.410             | 5.14%  |
|                                                           |            | GemNet-OC            | 0.397             | 8.45%  |
|                                                           |            | eSCN                 | 0.463             | 5.10%  |
|                                                           |            | EquiformerV2         | 0.414             | 6.56%  |
|                                                           |            | EquiformerV2 (large) | 0.405             | 9.87%  |

Table S12: Full results of metrics for IS2RS task on all data splits.

| Initial Structure to Relaxed Structure ( <i>IS2RS</i> ) Test |                      |                 |                |                 |
|--------------------------------------------------------------|----------------------|-----------------|----------------|-----------------|
| Split                                                        | Model                | ADwT $\uparrow$ | FbT $\uparrow$ | AFbT $\uparrow$ |
| test-id                                                      | GemNet-OC            | 85.46%          | 0.00%          | 6.53%           |
|                                                              | eSCN                 | 85.13%          | 0.40%          | 11.32%          |
|                                                              | EquiformerV2         | 87.92%          | 0.00%          | 12.05%          |
|                                                              | EquiformerV2 (large) | 87.37%          | 0.60%          | 11.44%          |
| test-ood(b)                                                  | GemNet-OC            | 87.79%          | 0.00%          | 4.54%           |
|                                                              | eSCN                 | 86.30%          | 0.60%          | 3.41%           |
|                                                              | EquiformerV2         | 88.57%          | 0.00%          | 3.28%           |
|                                                              | EquiformerV2 (large) | 87.50%          | 0.40%          | 4.50%           |
| test-ood(l)                                                  | GemNet-OC            | 69.74%          | 0.00%          | 1.97%           |
|                                                              | eSCN                 | 66.56%          | 0.40%          | 4.42%           |
|                                                              | EquiformerV2         | 74.34%          | 0.00%          | 4.83%           |
|                                                              | EquiformerV2 (large) | 75.44%          | 0.00%          | 4.78%           |
| test-ood(t)                                                  | GemNet-OC            | 60.03%          | 0.00%          | 0.95%           |
|                                                              | eSCN                 | 60.08%          | 0.00%          | 1.89%           |
|                                                              | EquiformerV2         | 68.23%          | 0.00%          | 1.58%           |
|                                                              | EquiformerV2 (large) | 66.97%          | 0.20%          | 2.50%           |
| test-ood(lt)                                                 | GemNet-OC            | 59.11%          | 0.00%          | 1.64%           |
|                                                              | eSCN                 | 61.27%          | 0.00%          | 3.54%           |
|                                                              | EquiformerV2         | 68.30%          | 0.00%          | 3.27%           |
|                                                              | EquiformerV2 (large) | 65.58%          | 0.20%          | 2.32%           |
